# Supplementary material for: Self-assembly of a snake-like blue photoluminescent coordination polymer from 4,4′-bis(imidazol-1-ylmethyl)biphenyl and zinc acetate
Source: Royal Society of Chemistry journal article supplement (doi:10.1039/b200383j), 2002-01-01
Supplement: b200383j.doc [file b200383j.doc]

Figure S1. Network structure of the complex (in color) linked by hydrogen bonds, indicated by dashed lines.
